# Supplementary material
Source: Springer Nature journal article supplement (https://www.springermedizin.de/resource/supplementary/13058_2010_2524_MOESM10_ESM.pdf/9701606)

**(a)**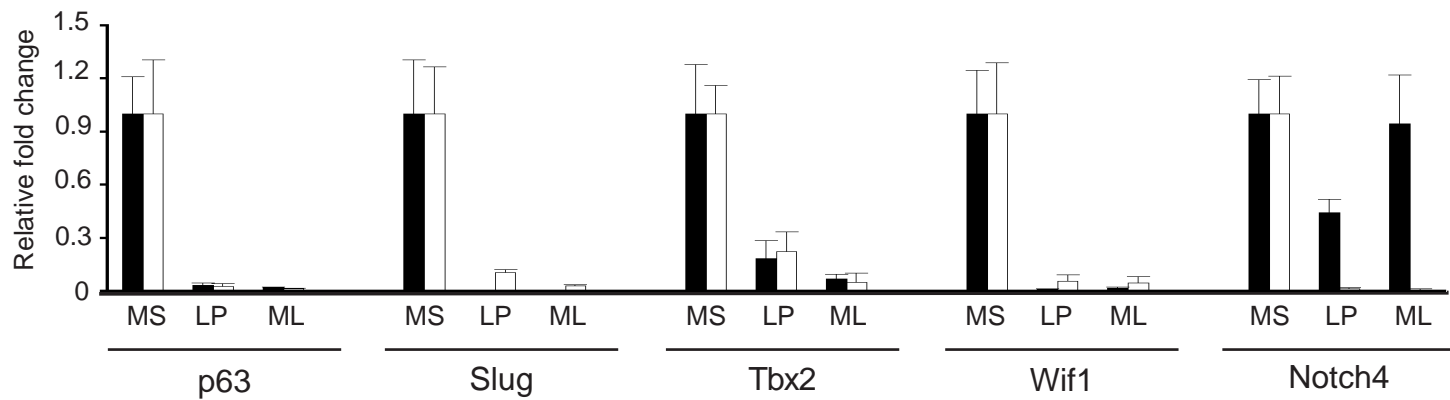**(b)**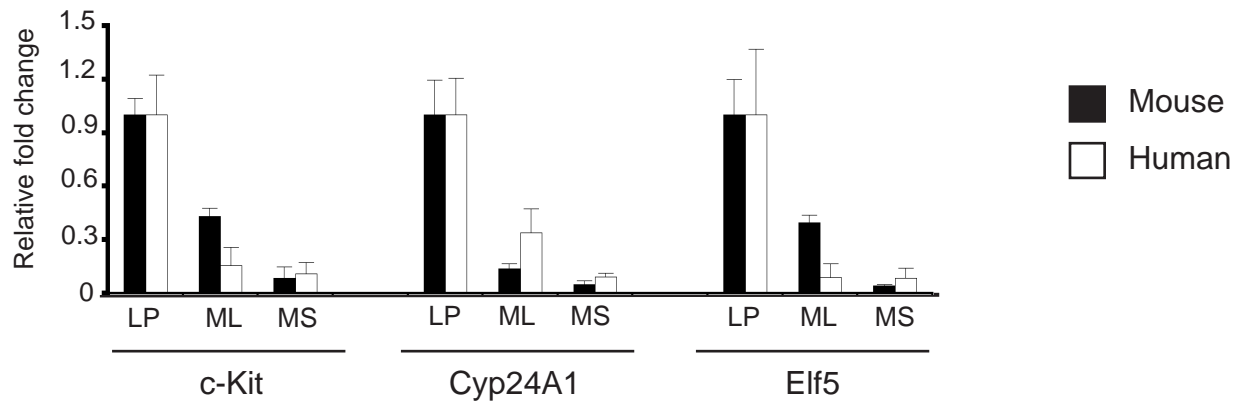**(c)**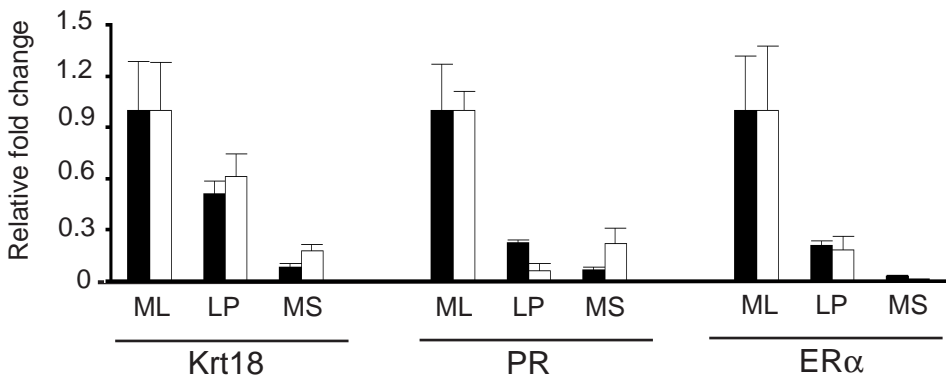

Supplement: MOESM10 [file 9701606]
